# Supplementary material for: Ru coordinated with BINAP in knitting aryl network polymers for heterogeneous asymmetric hydrogenation of methyl acetoacetate
Source: Royal Society of Chemistry journal article supplement (doi:10.1039/c5ra23597a), 2016-01-01
Supplement: c5ra23597a1.pdf [file c5ra23597a1.pdf]

## **Ru coordinated with BINAP in knitting aryl network polymers for heterogeneous asymmetric hydrogenation of methyl acetoacetate**

Tao Wang,<sup>ac</sup> Yuan Lyu,<sup>\*a</sup> Xingkun Chen,<sup>ac</sup> Cunyao Li,<sup>ac</sup> Miao Jiang,<sup>a</sup> Xiangen Song<sup>a</sup> and Yunjie Ding<sup>\*ab</sup>

### **Catalysts Preparation**

Benzene, biphenyl, methanol and dichloromethane (DCM) were obtained from Tianjin Kemiou Chemical Reagent Co., Ltd. FeCl<sub>3</sub> (anhydrous) were obtained from National Medicines Co., Ltd. 1,3,5-triphenylbenzene and formaldehyde dimethyl acetal (FDA) were purchased from Aladdin Company. All solvents were analytical grade and were purified by distillation under Ar<sub>2</sub> atmosphere before use. Unless otherwise noted, all manipulations were carried out under Ar<sub>2</sub> atmosphere either in a glove-box or using standard Schlenk techniques.

### **Synthesis of KAP-1**

In a glove box, FeCl<sub>3</sub> (anhydrous 4.866g, 30mmol) was added to a solution of BINAP (0.249 g, 0.4 mmol), benzene (0.781 g, 10 mmol) and FDA (2.283 g, 30 mmol) in 20ml DCM. The mixture was firstly stirred at 35 °C for 4 h to form original network, and then heated at 80 °C for 68 h. The precipitate was filtered under inert atmosphere with methanol (1500 mL) and DCM (500 mL), then washed with methanol and DCM in a

Soxhlet for each 12 h under inert atmosphere. KAP-1 was finally dried under reduced pressure at 60 °C for 24 h.

### **Synthesis of KAP-2**

In a glove box, FeCl<sub>3</sub> (anhydrous 3.244 g, 20 mmol) was added to a solution of BINAP (0.249 g, 0.4 mmol), biphenyl (0.771 g, 5 mmol) and FDA (1.522 g, 20 mmol) in 14 mL DCM. The mixture was firstly stirred at 35 °C for 4 h to form original network, and then heated at 80 °C for 68 h. The precipitate was filtered under inert atmosphere with methanol (1500 mL) and DCM (500 mL), then washed with methanol and DCM in a Soxhlet for each 12 h under inert atmosphere. KAP-2 was finally dried under reduced pressure at 60 °C for 24 h.

### **Synthesis of KAP-3**

In a glove box, FeCl<sub>3</sub> (anhydrous 2.433 g, 15 mmol) was added to a solution of BINAP (0.249 g, 0.4 mmol), 1,3,5-triphenylbenzene (0.766 g, 2.5 mmol) and FDA (1.141 g, 15 mmol) in 10 mL DCM. The mixture was firstly stirred at 35 °C for 4 h to form original network, and then heated at 80 °C for 68 h. The precipitate was filtered under inert atmosphere with methanol (1500 mL) and DCM (500 mL), then washed with methanol and DCM in a Soxhlet for each 12 h under inert atmosphere. KAP-3 was finally dried under reduced pressure at 60 °C for 24 h.

### **Characterization**

Nitrogen isotherms at 77.3 K were measured using micromeritics ASAP 2420. The samples were outgassed at 120 °C for 10 h. The pore size distributions were calculated using density functional method (DFT). Thermogravimetric analysis (TGA) was measured using NETZSCH STA 449F3, and the samples were heated from 40 °C to 1000 °C at the rate of 10 °C/min under air. Transmission electron microscope (TEM) images were taken on a JEM-2100 with an accelerating voltage of 200 kV. Polymer morphologies were investigated on a JSM-7800F scanning electron microscope (SEM). Solid-state NMR spectra were obtained on a VARIAN infinity plus spectrometer. The <sup>31</sup>P MAS NMR spectra were recorded with a 2.5 mm probe at a frequency of 161.8 MHz under a magic angle spinning rate of 10 kHz and a delay of 3 s. The chemical shifts were referenced to 85% H<sub>3</sub>PO<sub>4</sub>. <sup>13</sup>C MAS NMR spectra were recorded under a magic angle spinning rate of 6 kHz.

### **Catalytic process**

Dichloro( $\eta^6$ -benzene)ruthenium( II ) dimer, ([RuCl<sub>2</sub>(benene)]<sub>2</sub>): This ruthenium ( II ) complex was synthesized according the previous published procedure.<sup>1</sup> Hydrated ruthenium(III)chloride (1.065 g, 4.07 mmol) was dissolved in 50mL of 90% (V/V) ethanol. After dropwise addition of excess 1,3-cyclohexadiene (5.0 mL), the mixture was heated at 85 °C for 4 h under ambient conditions. The red production was

collected by filtration, washed with amount of ethanol, and dried under vacuum.

In a glove box, 3.60 mg  $[\text{RuCl}_2(\text{benzene})]_2$  was dissolved in 6 mL DMF, followed by the addition of 0.50 g KAP-1 in 12 mL DCM. After stirring at room temperature for 24 h, Ru/KAP-1 catalyst was obtained under reduced pressure at 85 °C for 6 h. Other catalysts Ru/KAP-2, Ru/KAP-3, and Ru/KAP-4 were prepared in the same way. Notably, the theoretical BINAP/Ru (molar ratios) of all the catalysts was 10.

As a typical run for asymmetric hydrogenation of  $\beta$ -keto esters, Ru/KAP-1 catalyst (0.03 g, 0.00086 mmol), methyl acetoacetate (0.20 g, 1.72 mmol) and anhydrous methanol (2mL) were added into a 30 mL autoclave in a glove box. After the reactor was purged with  $\text{H}_2$  for 4 times, its pressure of  $\text{H}_2$  was finally adjusted to desired value and heated from room temperature to the reaction temperature of 80 °C, stirred for 10 h. The catalyst was separated by centrifugation, and the product was analyzed by gas chromatography (Agilent 7890B gas chromatography equipped with a flame ionization detector and a Cyclosil-B capillary column).

For recycling the catalyst, the catalyst was separated by centrifugation (performed in a glove box), washed with methanol (3×2 mL), then the catalyst was used directly for the next catalytic reaction.

Table S1. Texture parameters for materials and their supported catalysts.

Figure S1. Pore size distribution of (a) KAP-1, (b) KAP-2, (c) KAP-3.

Figure S2. SEM image of (a) KAP-1, (b) KAP-2, (c) KAP-3.

Figure S3. TEM images and EDS on TEM of Ru/KAP-1.

Figure S4. TEM images and EDS on TEM of Ru/KAP-2.

Figure S5. TEM images and EDS on TEM of Ru/KAP-3.

Figure S6. The  $^{31}\text{P}$  MAS NMR spectra of Ru/KAP-1. The  $^{31}\text{P}$  MAS NMR spectra was recorded with a 2.5 mm probe at a frequency of 161.8 MHz under a magic angle spinning rate of 7 kHz and a delay of 3 s.

Figure S7. The effect of  $\text{H}_2$  pressure on the yield and ee values in hydrogenation of methyl acetoacetate catalyzed by Ru/KAP-1. All the reactions were carried out with  $S/C=2000$  (0.00086 mmol of Ru was used) and 2 mL methanol as solvent at 80 °C for 10 h under various  $\text{H}_2$  pressure.

Figure S8. The effect of temperature on the yield and ee values in hydrogenation of methyl acetoacetate catalyzed by Ru/KAP-1. All the reactions were carried out with  $S/C=2000$  (0.00086 mmol of Ru was used) and 2 mL methanol as solvent at 2 MPa for 10 h under various reaction temperature.

Figure S9. The effect of  $S/C$  molar ratios on the yield and ee values in hydrogenation of methyl acetoacetate catalyzed by Ru/KAP-1. All the reactions were carried out under a  $\text{H}_2$  pressure of 2 MPa and 0.00086 mmol of Ru at 80 °C for 10 h with various methyl acetoacetate amounts (0.86-5.16 mmol).

Table S1. Texture parameters for materials and their supported catalysts.

| <b>Sample</b> | <b>S<sub>BET</sub> (m<sup>2</sup>/g)</b> | <b>Pore volume (cm<sup>3</sup>/g)</b> |
|---------------|------------------------------------------|---------------------------------------|
| KAP-1         | 1280                                     | 1.94                                  |

---

|          |      |      |
|----------|------|------|
| KAP-2    | 1125 | 0.78 |
| KAP-3    | 1282 | 0.92 |
| Ru/KAP-1 | 1268 | 1.74 |
| Ru/KAP-2 | 1110 | 0.81 |
| Ru/KAP-3 | 1210 | 0.92 |

---

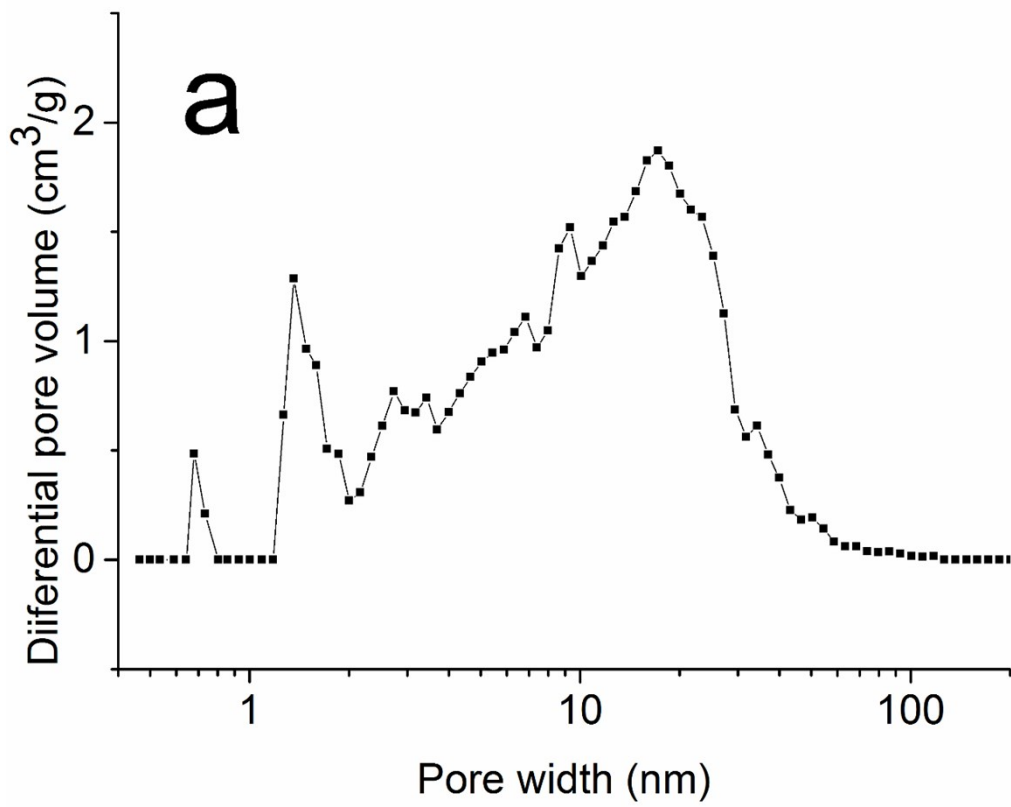

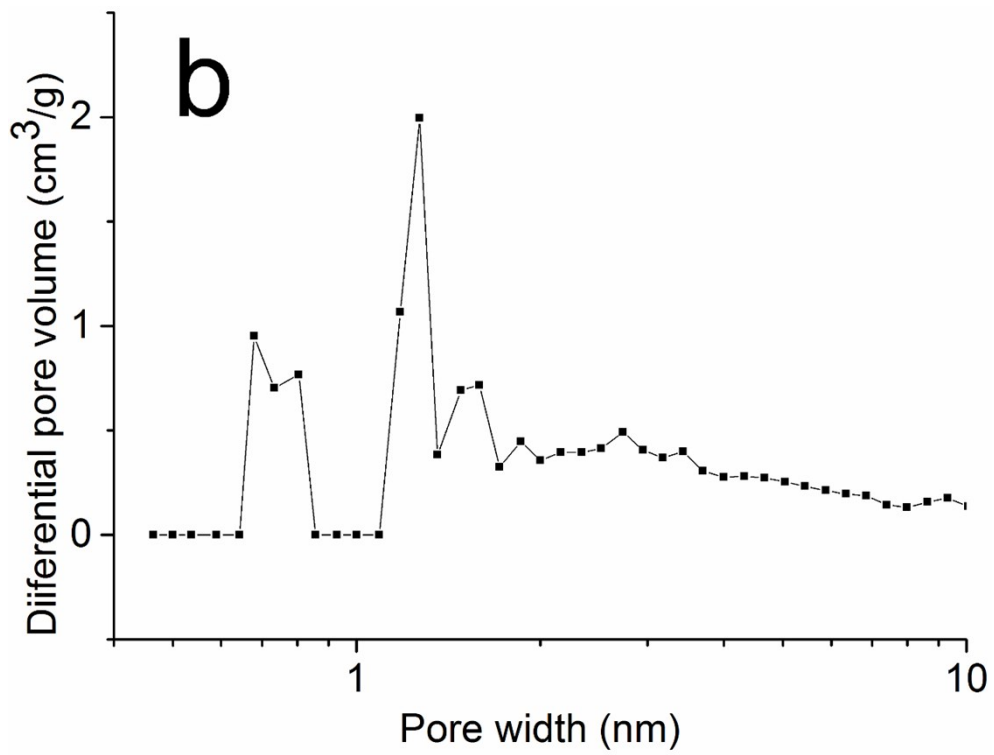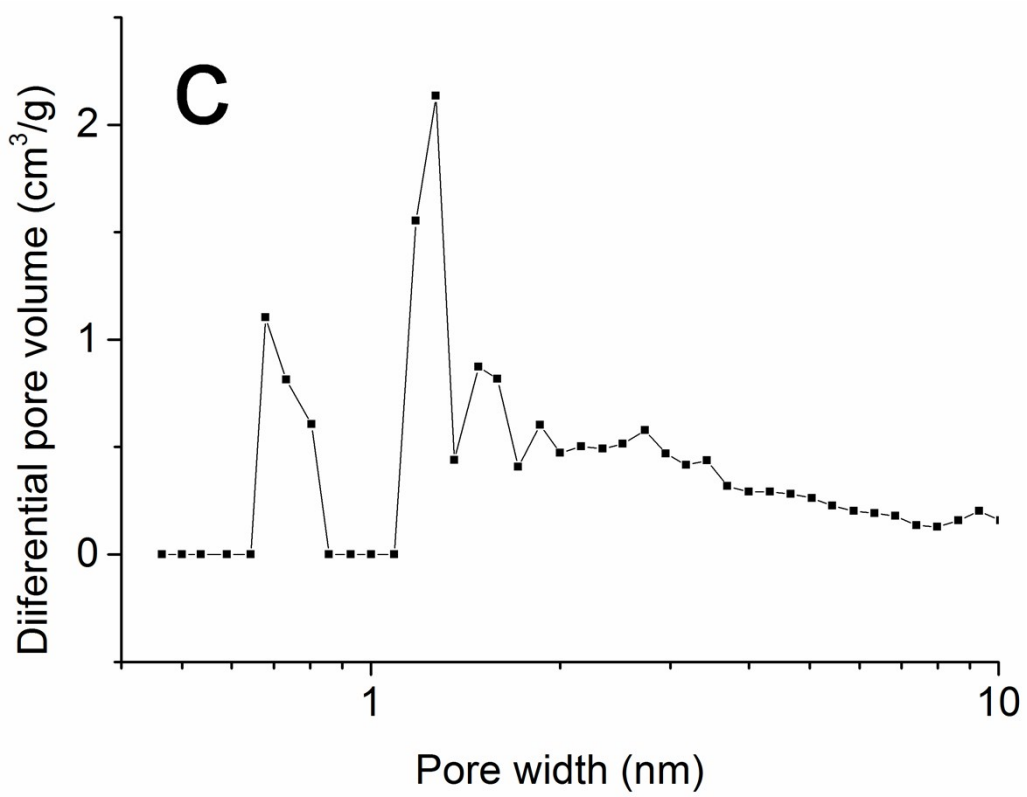

Figure S1 Pore size distribution of (a) KAP-1, (b) KAP-2, (c) KAP-3.



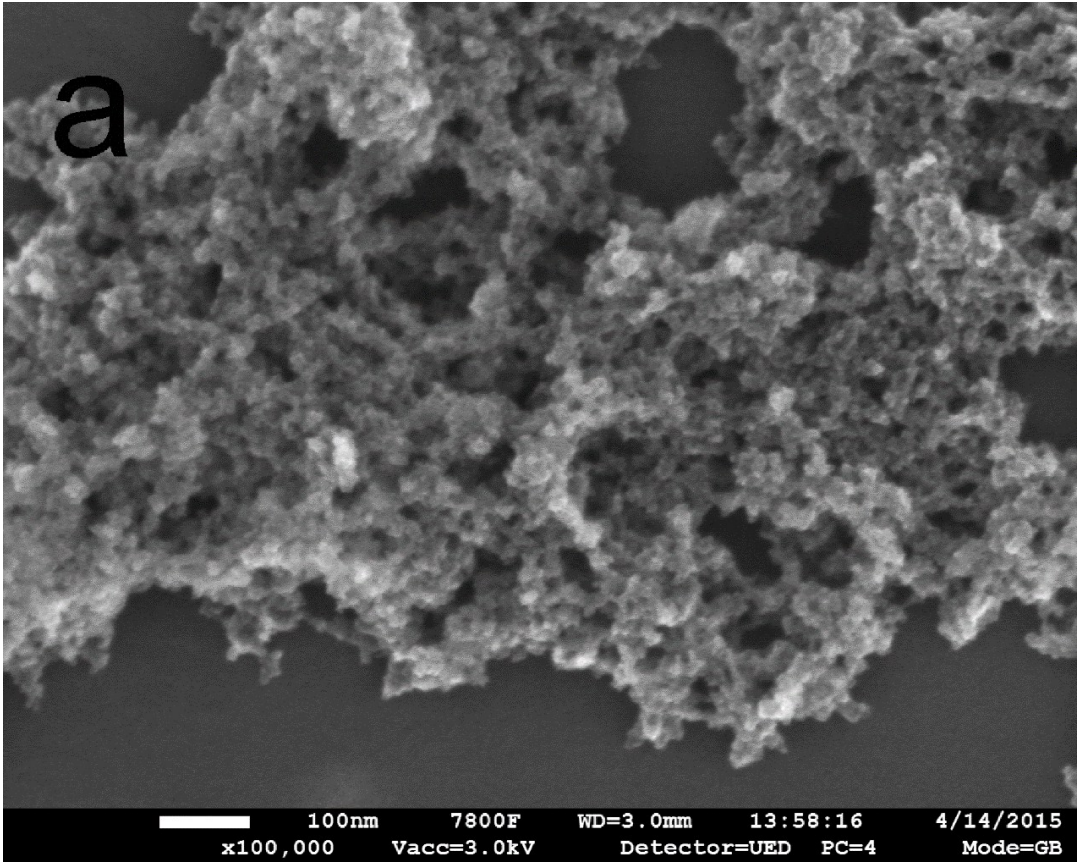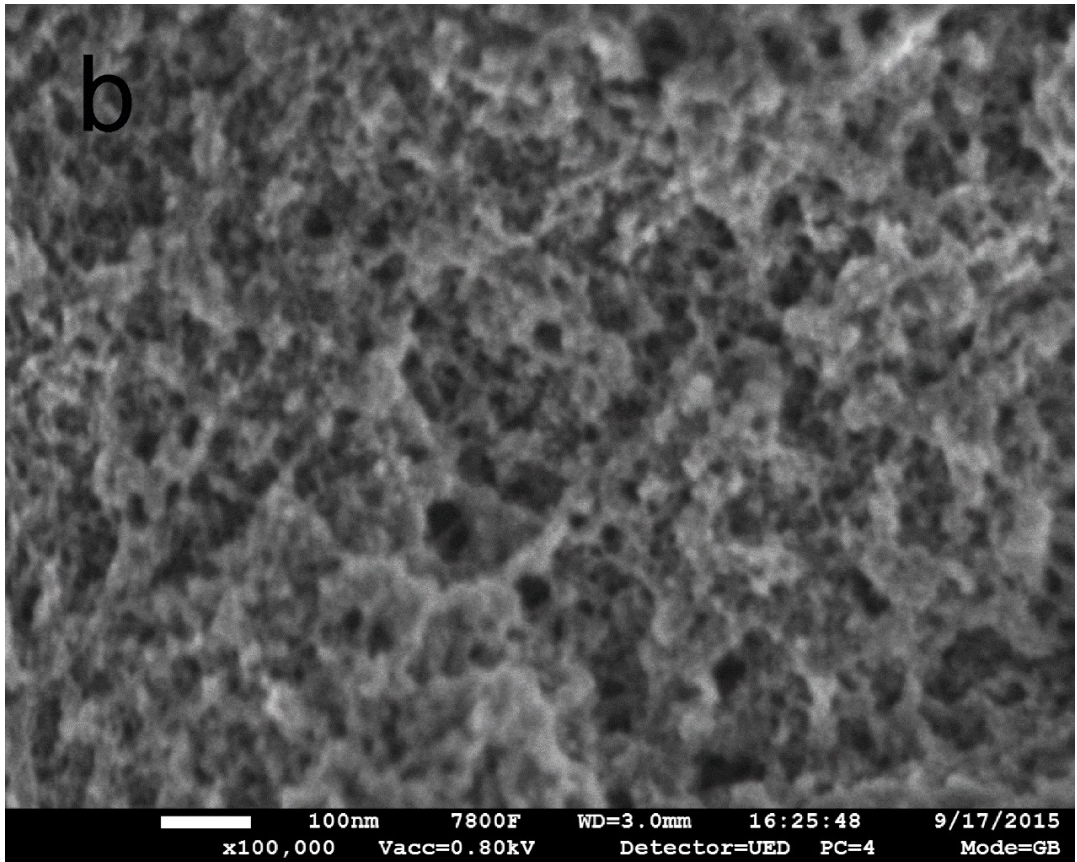

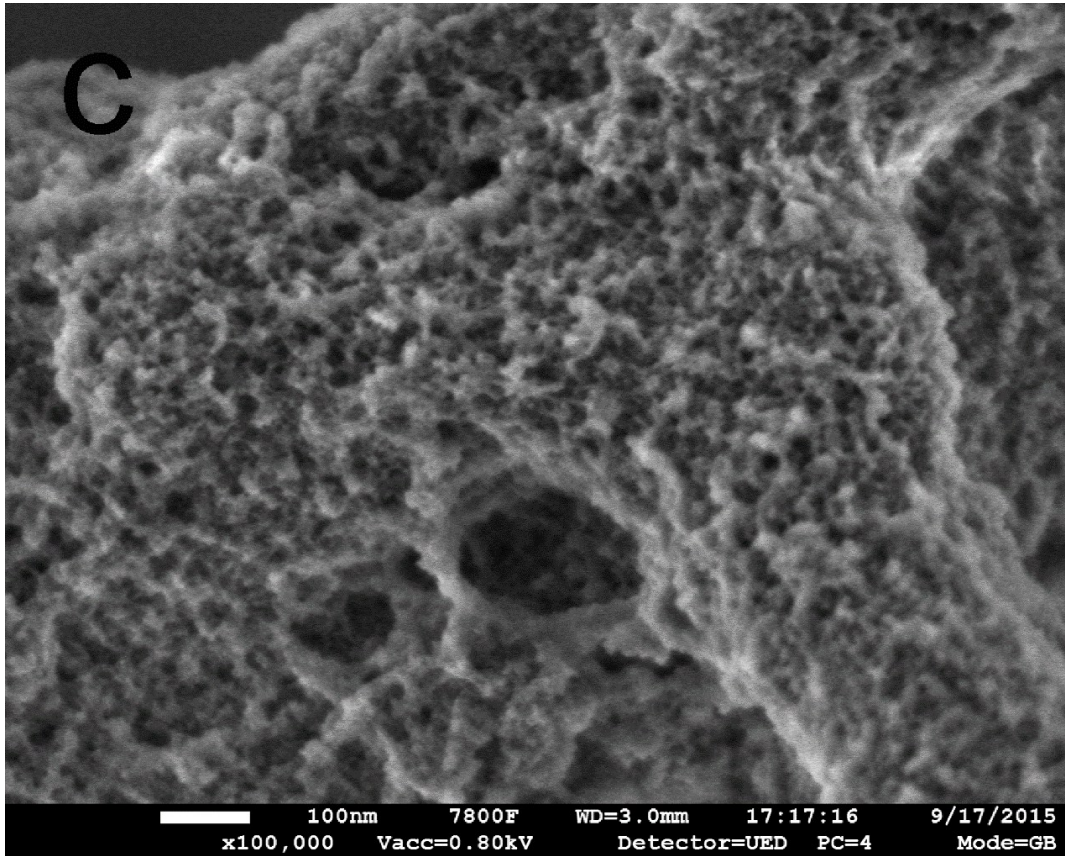

Fig. S2 SEM image of (a) KAP-1, (b) KAP-2, (c) KAP-3.

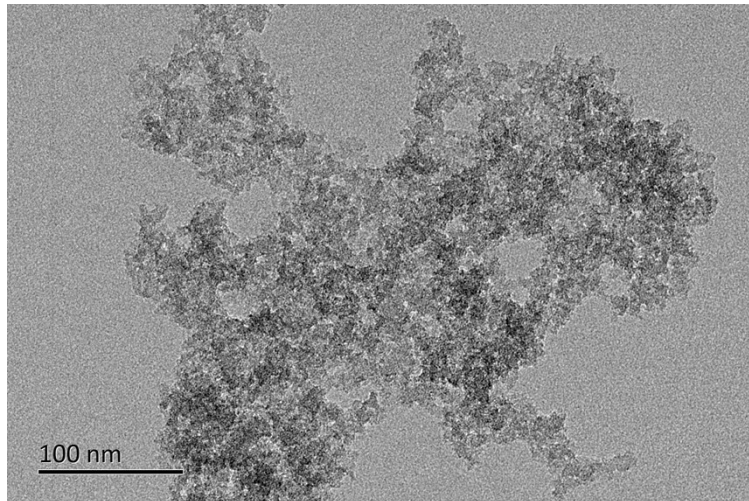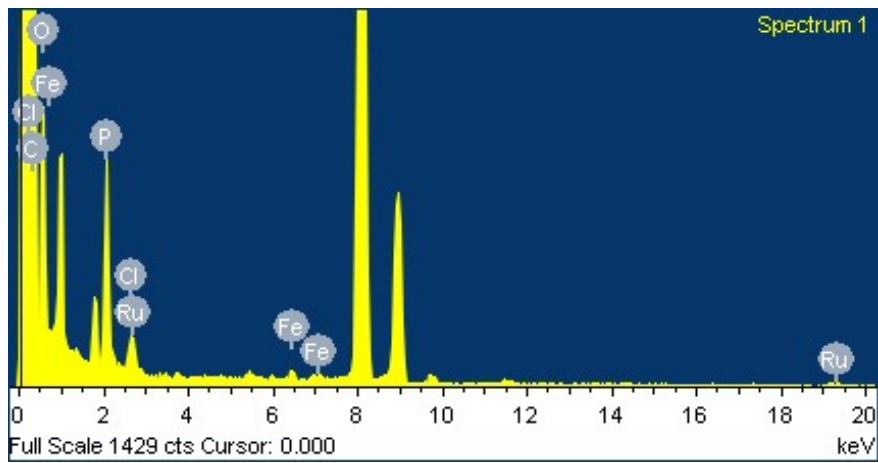

Spectrum processing:

Peaks possibly omitted: 8.043, 8.903, 9.706 keV

Quantitation method: Cliff Lorimer thin ratio section.

Processing option: All elements analyzed (Normalised)

Number of iterations = 2

Standardless

| Element | Weight% | Atomic% |
|---------|---------|---------|
| C K     | 97.44   | 98.68   |
| O K     | 1.12    | 0.85    |
| P K     | 0.97    | 0.38    |
| Cl K    | 0.13    | 0.05    |
| Fe K    | 0.08    | 0.02    |
| Ru K    | 0.26    | 0.03    |
| Totals  | 100.00  |         |

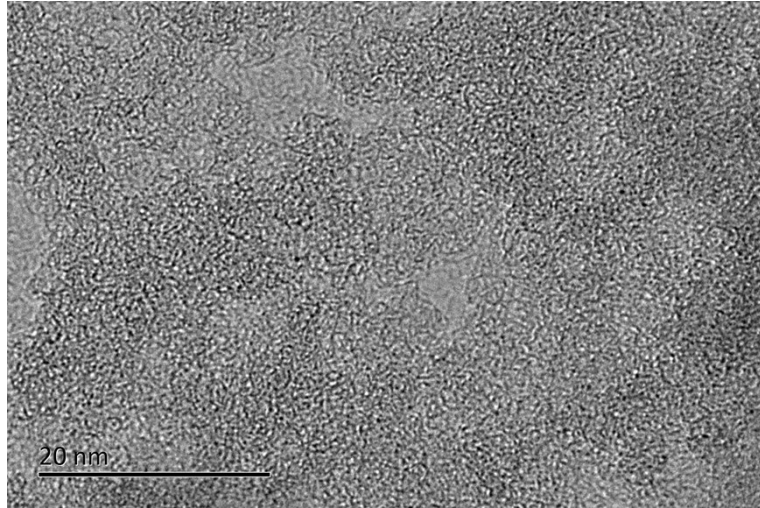

Figure S3. TEM images and EDS on TEM of Ru/KAP-1.

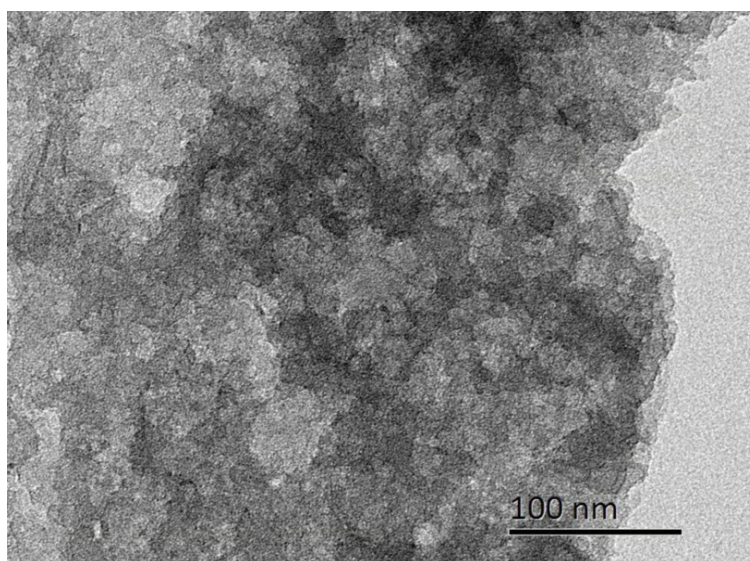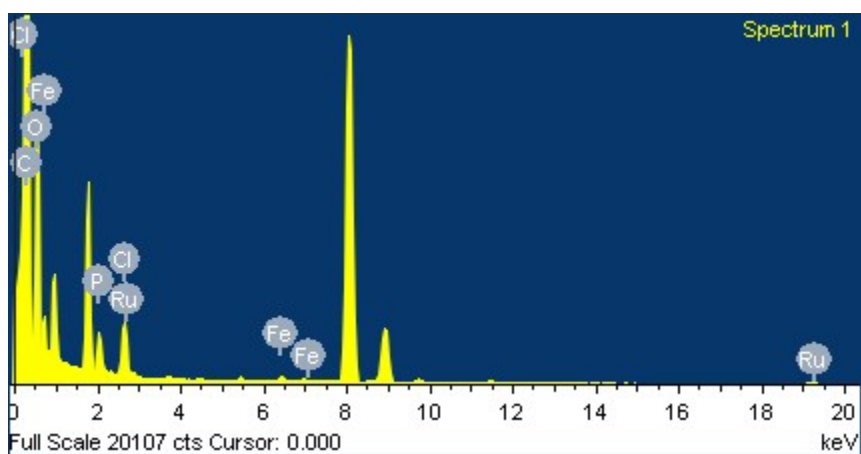

Spectrum processing:

Peaks possibly omitted: 3.699, 5.415, 8.043, 8.430, 8.903, 9.710, 11.419 keV

Quantitation method: Cliff Lorimer thin ratio section.

Processing option: All elements analyzed (Normalised)

Number of iterations = 3

Standardless

| Element | Weight% | Atomic% |
|---------|---------|---------|
| C K     | 96.30   | 97.73   |
| O K     | 2.53    | 1.93    |
| P K     | 0.38    | 0.15    |
| Cl K    | 0.43    | 0.15    |
| Fe K    | 0.06    | 0.01    |
| Ru K    | 0.30    | 0.04    |
| Totals  | 100.00  |         |

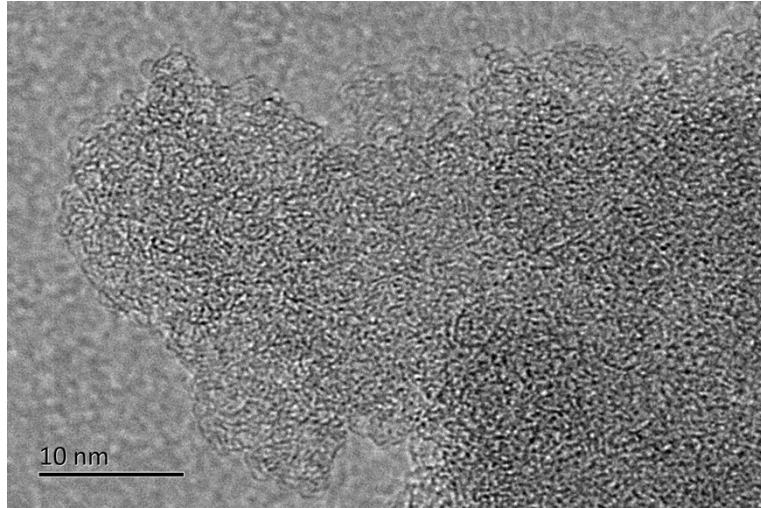

Figure S4. TEM images and EDS on TEM of Ru/KAP-2.

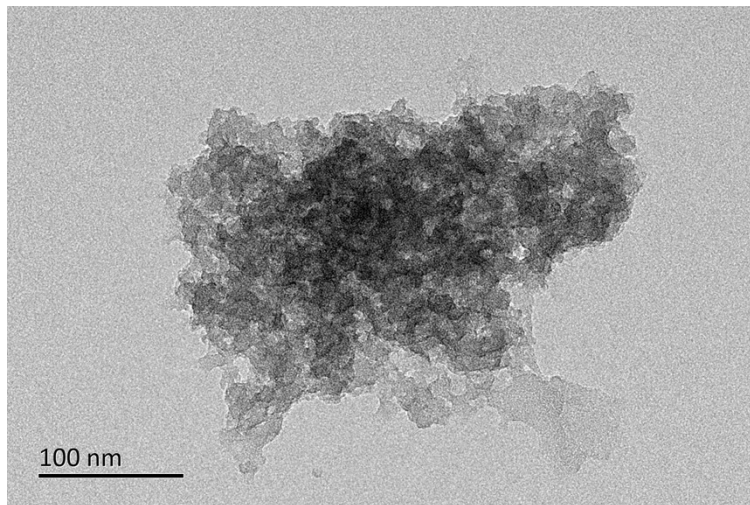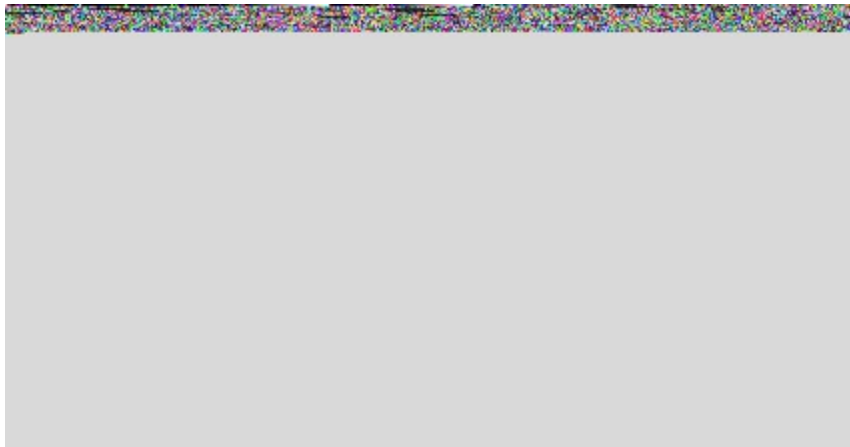

Spectrum processing:

Peaks possibly omitted: 8.043, 8.900, 9.726, 11.470 keV

Quantitation method: Cliff Lorimer thin ratio section.

Processing option: All elements analyzed (Normalised)

Number of iterations = 3

Standardless

| Element | Weight% | Atomic% |
|---------|---------|---------|
| C K     | 95.46   | 97.12   |
| O K     | 3.26    | 2.49    |
| P K     | 0.54    | 0.21    |
| Cl K    | 0.33    | 0.11    |
| Fe K    | 0.07    | 0.02    |
| Ru K    | 0.33    | 0.04    |
| Totals  | 100.00  |         |

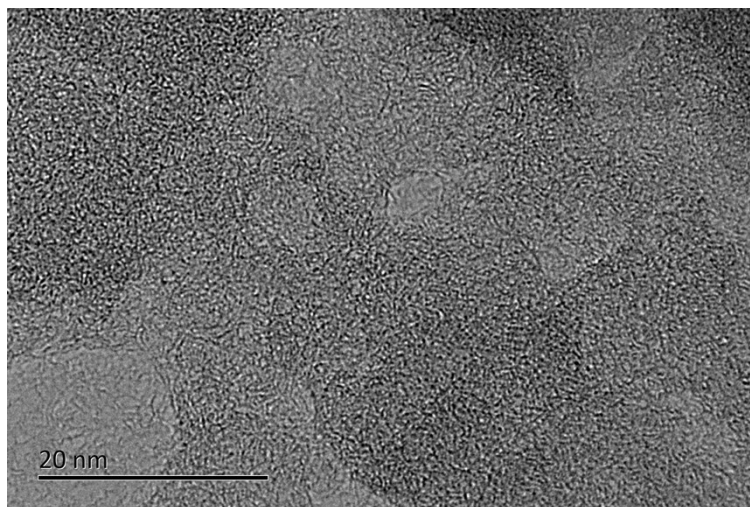

Figure S5. TEM images and EDS on TEM of Ru/KAP-3.



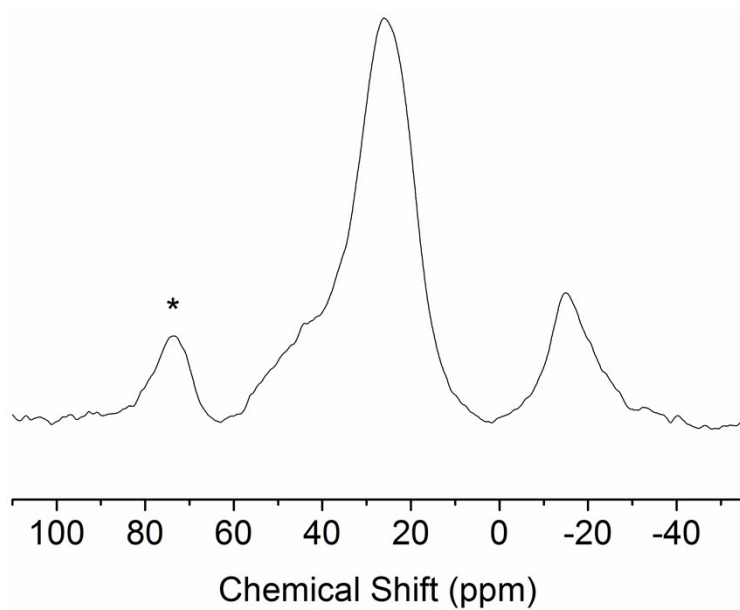

Figure S6.

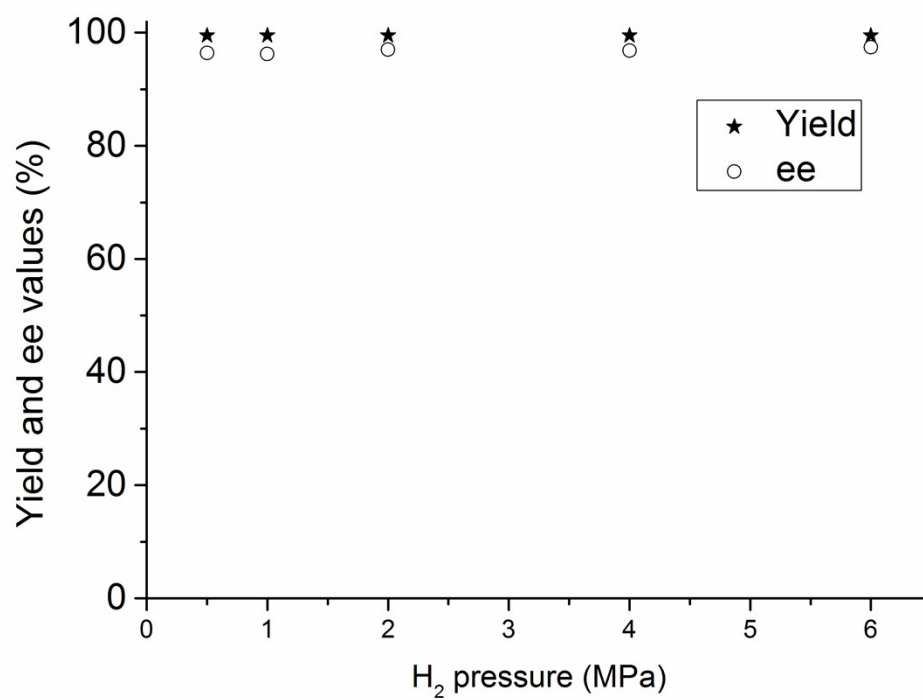

Figure S7

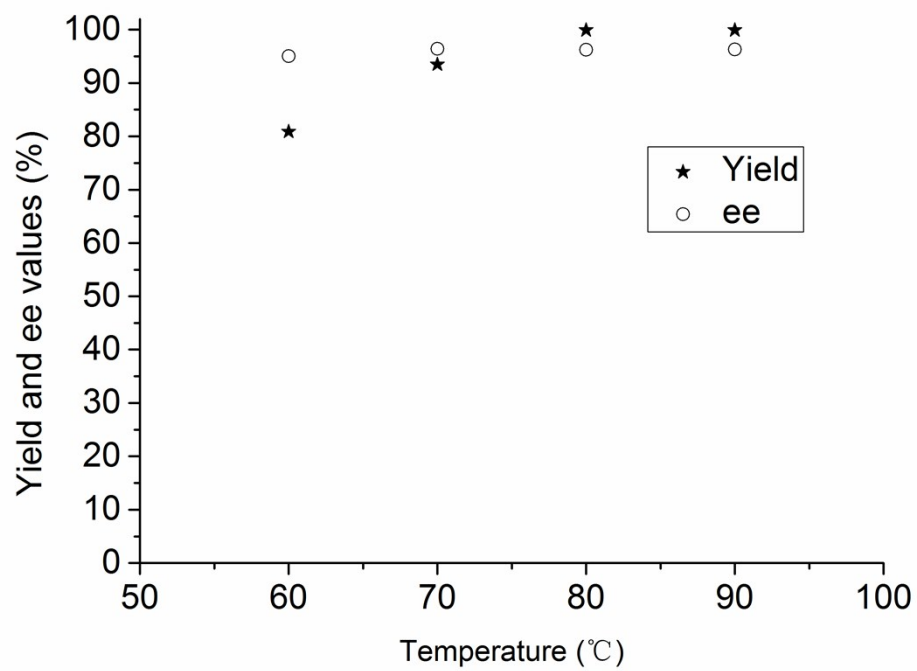

Figure S8.

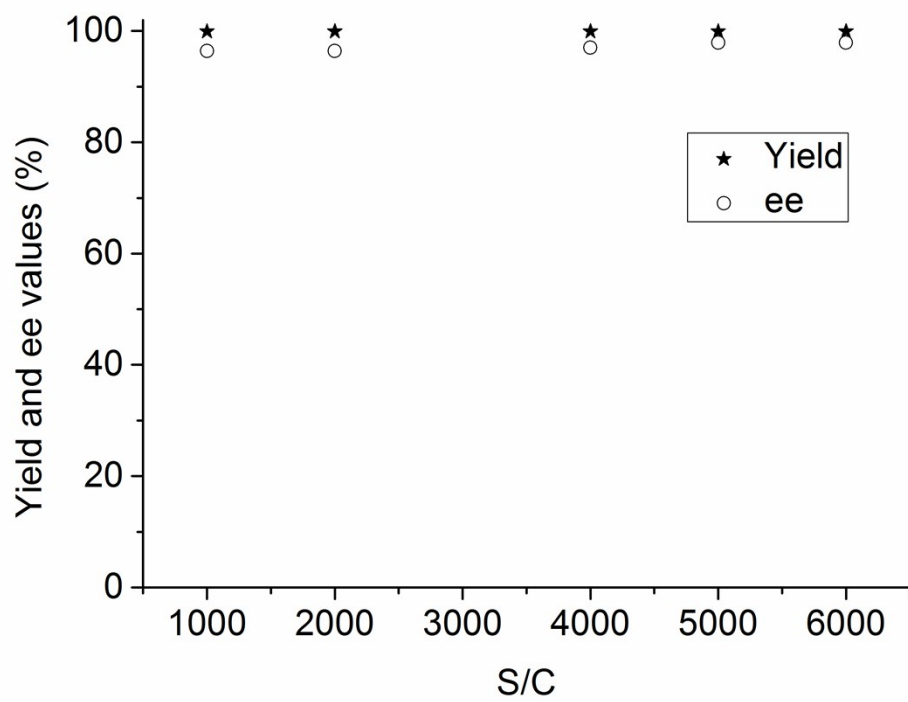

Figure S9.

**Reference:**

1 M. Myahkostupov and F. N. Castellano, *Inorg. Chem.*, 2011, 50, 9714.
